# Supplementary material for: Coordination chemistry of N-aminopropyl pendant arm derivatives of mixed N/S-, and N/S/O-donor macrocycles, and construction of selective fluorimetric chemosensors for heavy metal ions
Source: Royal Society of Chemistry journal article supplement (doi:10.1039/b506785e), 2005-01-01
Supplement: b506785e.pdf [file b506785e.pdf]

## Synthesis and spectroscopic characterisation of $L^{1c-1e}$ , $L^{2b2-e}$ , $L^{3b-3d}$ and the metal complexes isolated.

**Synthesis of  $L^{1c}$ .** It was obtained as a colourless oil starting from  $L^{1b}$  and using the same procedure described for  $L^{4c}$  (see paper). Yield: 76%.  $^1\text{H-NMR}$  (300 MHz, 298 K,  $\text{CDCl}_3$ ):  $\delta_{\text{H}}$  1.43-1.47 (2H, m), 2.00 (2H, br), 2.41 (2H, t,  $J = 7.2\text{Hz}$ ), 2.57-2.74 (16H, m), 3.63 (2H, t,  $J = 4.6\text{Hz}$ ).  $^{13}\text{C-NMR}$  (300 MHz, 298 K,  $\text{CDCl}_3$ ):  $\delta_{\text{C}}$  27.58, 30.16, 31.06, 40.17, 51.14, 53.00, 74.17. Concentrated  $\text{HClO}_4$  was added to a solution of  $L^{1c}$  in dry EtOH to give a white precipitate. This solid was filtered off, dried under reduced pressure and crystallised from  $\text{dmf}/\text{Et}_2\text{O}$  to give the salt  $(\text{H}_2\text{L}^{1c})(\text{ClO}_4)_2 \cdot \text{dmf}$ . Elem. Anal.: found (calc. for  $\text{C}_{14}\text{H}_{33}\text{Cl}_2\text{N}_3\text{O}_{10}\text{S}_2$ ): C, 31.20 (31.23); H, 6.15 (6.18); N, 7.84 (7.80); S, 11.85 (11.91).

**Synthesis of  $L^{1d}$ .** It was obtained as a yellow solid starting from  $L^{1c}$  and using the same procedure described for  $L^{4d}$  (see paper). Yield: 73%. Mp: 90-92°C. Elem. Anal.: found (calc. for  $\text{C}_{23}\text{H}_{35}\text{N}_3\text{S}_3\text{O}_3$ ): C, 55.54 (55.50); H, 7.30 (7.09); N, 8.60 (8.44); S, 19.30 (19.33).  $^1\text{H NMR}$  (400 MHz,  $\text{CDCl}_3$ ):  $\delta_{\text{H}}$  1.51-1.53 (2H, m), 2.43 (2H, t,  $J = 5.8\text{ Hz}$ ), 2.65-2.69 (8H, m), 2.78-2.81 (8H, m), 2.84 (6H, s), 2.95 (2H, t,  $J = 4\text{ Hz}$ ), 7.14 (1H, d,  $J = 8\text{ Hz}$ ), 7.47 (1H, t,  $J = 8\text{ Hz}$ ), 7.53 (1H, t,  $J = 8\text{ Hz}$ ), 8.19 (1H, d,  $J = 8\text{ Hz}$ ), 8.32 (1H, d,  $J = 8\text{ Hz}$ ), 8.47 (1H, d,  $J = 8\text{ Hz}$ ).  $^{13}\text{C NMR}$  (400 MHz,  $\text{CDCl}_3$ ):  $\delta_{\text{C}}$  25.08, 27.18, 30.35, 43.49, 45.19, 50.80, 54.63, 74.39, 114.84, 118.88, 122.90, 127.91, 129.23, 129.48, 129.58, 129.82, 134.74, 151.60. Mass Spectrum  $\text{EI}^+$ :  $m/z$  497 ( $[\text{C}_{23}\text{H}_{35}\text{N}_3\text{S}_3\text{O}_3]^+$ ).

**Synthesis of  $L^{1e}$ .** It was obtained as a yellow solid starting from  $L^{1c}$  and using the same procedure described for  $L^{4e}$  (see paper). Yield: 45%. M.p.: 126-127°C. Elem. Anal.: found (calc. for  $\text{C}_{26}\text{H}_{34}\text{N}_2\text{S}_2\text{O}$ ): C, 68.57 (68.68); H, 7.30 (7.54); N, 5.97 (6.16); S, 14.24 (14.10).  $^1\text{H NMR}$  (400 MHz,  $\text{CDCl}_3$ ):  $\delta_{\text{H}}$  1.23-1.25 (2H, m), 1.74-1.77 (2H, m), 2.46-2.49 (2H, m), 2.62-2.70 (10H, m), 2.95-2.97 (2H, m), 3.65 (4H, s), 4.54 (1H, br), 4.81 (2H, s), 7.46-7.49 (2H, m), 7.55-7.59 (2H, m), 8.00 (2H, d,  $J = 8\text{Hz}$ ), 8.33 (2H, d,  $J = 8.8\text{Hz}$ ), 8.42 (1H, s).  $^{13}\text{C NMR}$  (400 MHz,  $\text{CDCl}_3$ ):  $\delta_{\text{C}}$  26.35, 27.28, 30.27, 44.90, 48.94, 50.89, 54.10, 74.41, 123.83, 124.96, 126.44, 127.74, 129.13, 130.32, 131.35. Mass Spectrum  $\text{EI}^+$ :  $m/z$  455 ( $[\text{C}_{26}\text{H}_{34}\text{N}_2\text{S}_2\text{O}]^+$ ).

**Synthesis of  $L^{2b}$ .** Acrylonitrile (5 ml) was added to a solution of  $L^{2a}$  (0.5 g, 2.2 mmol) in  $\text{H}_2\text{O}:\text{EtOH}$  (40 mL, 1:1 v/v). The mixture was refluxed for 24 hours under  $\text{N}_2$ . After cooling the volume of the mixture was reduced to 15 mL under reduced pressure. After 12 hours at 0°C a white solid formed. (0.48 g, 1.7 mmol, 77% yield). M.p.: 84-85°C. Elem. Anal.: found (calc. for  $\text{C}_{11}\text{H}_{20}\text{N}_2\text{S}_3$ ): C, 47.85 (47.79); H, 7.51 (7.29); N, 10.18 (10.13); S, 34.52 (34.79).  $^1\text{H-NMR}$  (400 MHz, 298 K,  $\text{CDCl}_3$ ):  $\delta_{\text{H}}$  2.49-2.51 (2H, m), 2.64-2.65 (4H, m), 2.77-2.80 (14H, m).  $^{13}\text{C-NMR}$  (400 MHz, 298 K,  $\text{CDCl}_3$ ):  $\delta_{\text{C}}$  16.84, 26.61, 27.95, 29.03, 50.06, 52.93, 118.70.

**Synthesis of  $L^{2c}$ .** It was obtained as a colourless oil starting from  $L^{2b}$  and using the same procedure described for  $L^{4c}$  (see paper). Yield: 87%.  $^1\text{H-NMR}$  (400 MHz, 298 K,  $\text{CDCl}_3$ ):  $\delta_{\text{H}}$  1.55-1.58 (2H, m), 1.76 (2H, br), 2.44-2.76 (20H, m).  $^{13}\text{C-NMR}$  (300 MHz, 298 K,  $\text{CDCl}_3$ ):  $\delta_{\text{C}}$  26.17, 28.08, 28.90, 31.04, 40.26, 52.16, 52.38.

**Synthesis of  $L^{2d}$ .** It was obtained as a yellow solid starting from  $L^{2c}$  and using the same procedure described for  $L^{4d}$  (see paper). Yield: 46%. Mp: 110-112°C. Elem. Anal.: found (calc. for  $\text{C}_{23}\text{H}_{35}\text{N}_3\text{S}_4\text{O}_2$ ): C, 54.64 (53.77); H, 7.88 (6.87); N, 8.00 (8.18); S, 23.52 (24.96).  $^1\text{H NMR}$  (400 MHz,  $\text{CDCl}_3$ ):  $\delta_{\text{H}}$  1.50-1.56 (2H, m), 2.35 (2H, t,  $J = 4\text{ Hz}$ ), 2.48-2.56 (8H, m), 2.64-2.68 (8H, m), 2.85 (6H, s), 2.96 (2H, t,  $J = 4\text{ Hz}$ ), 6.15 (1H, br), 7.14 (1H, d,  $J = 7.2\text{ Hz}$ ), 7.46-7.54 (2H, m), 8.20 (1H, d,  $J = 7.6\text{ Hz}$ ), 8.28 (1H, d,  $J = 8.8\text{ Hz}$ ), 8.49 (1H, d,  $J = 8.4\text{ Hz}$ ).  $^{13}\text{C NMR}$  (400 MHz,

CDCl<sub>3</sub>):  $\delta_C$  25.07, 25.56, 27.72, 28.33, 42.42, 45.17, 51.14, 52.57, 114.88, 118.56, 122.97, 127.98, 129.38, 129.45, 129.59, 130.05, 134.48, 151.75. Mass Spectrum EI<sup>+</sup>: m/z 514 ([C<sub>23</sub>H<sub>35</sub>N<sub>3</sub>S<sub>4</sub>O<sub>2</sub>]<sup>+</sup>).

**Synthesis of L<sup>2e</sup>.** It was obtained as a yellow solid starting from L<sup>2c</sup> and using the same procedure described for L<sup>4c</sup> (see paper). Yield: 49%. Mp.: 120-121°C. Elem. Anal: found (calc. for C<sub>26</sub>H<sub>34</sub>N<sub>2</sub>S<sub>3</sub>): C, 66.01 (66.33); H, 7.68 (7.28); N, 5.46 (5.95); S, 19.97 (20.43). <sup>1</sup>H NMR (400 MHz, CDCl<sub>3</sub>):  $\delta_H$  1.69-1.73 (2H, m), 2.43-2.46 (6H, m), 2.55-2.69 (12H, m), 2.89-2.93 (2H, m), 4.74 (2H, s), 7.43-7.47 (2H, m), 7.51-7.55 (2H, m), 7.99 (2H, d, J = 8.4Hz), 8.32 (2H, d, J = 8.8 Hz), 8.40 (1H, s). <sup>13</sup>C NMR (300 MHz, CDCl<sub>3</sub>):  $\delta_C$  26.06, 27.31, 28.07, 28.84, 45.60, 48.64, 52.30, 52.75, 124.02, 124.95, 126.18, 127.36, 129.20, 130.26, 131.14, 131.49. Mass Spectrum EI<sup>+</sup>: m/z 471 ([C<sub>26</sub>H<sub>34</sub>N<sub>2</sub>S<sub>3</sub>]<sup>+</sup>).

**Synthesis of L<sup>3b</sup>.** It was obtained as a colourless oil starting from L<sup>3a</sup> and using the same procedure described for L<sup>4b</sup> (see paper). Yield: 83%. Elem. Anal.: found (calc. for C<sub>14</sub>H<sub>24</sub>N<sub>4</sub>SO): C, 56.43 (56.73); H, 8.82 (8.16); N, 18.66 (18.90); S, 10.29 (10.82). <sup>1</sup>H-NMR (300 MHz, 298 K, CDCl<sub>3</sub>):  $\delta_H$  2.47-2.50 (4H, m), 2.52-2.54 (4H, m), 2.73-2.84 (12H, m), 3.47-3.52 (4H, m). <sup>13</sup>C-NMR (400 MHz, 298 K, CDCl<sub>3</sub>):  $\delta_C$  18.00, 32.57, 48.73, 53.47, 55.42, 69.5, 117.6.

**Synthesis of L<sup>3c</sup>.** It was obtained as a yellow solid starting from L<sup>3b</sup> and using the same procedure described for L<sup>4c</sup> (see paper). Yield: 65%. <sup>1</sup>H-NMR (400 MHz, 298 K, CDCl<sub>3</sub>):  $\delta_H$  2.03-2.12 (4H, m), 2.73-3.87 (24H, m). <sup>13</sup>C-NMR (300 MHz, 298 K, CDCl<sub>3</sub>):  $\delta_C$  26.23, 31.11, 40.09, 53.65, 53.87, 54.39, 70.93.

**Synthesis of L<sup>3d</sup>.** It was obtained as a yellow solid starting from L<sup>3c</sup> and using the same procedure described for L<sup>4d</sup> (see paper). Yield: 44%. M.p.: 82-84°C. Elem. Anal.: found (calc. for C<sub>38</sub>H<sub>54</sub>N<sub>6</sub>S<sub>3</sub>O<sub>5</sub>): C, 59.34 (59.19); H, 7.58 (7.06); N, 10.08 (10.90); S, 11.78 (12.47). <sup>1</sup>H NMR (400 MHz, CDCl<sub>3</sub>):  $\delta_H$  1.19 (4H, t, J = 7.2Hz), 1.51-1.56 (4H, m), 2.41-2.44 (4H, m), 2.57-2.64 (4H, m), 2.75-2.77 (4H, m), 2.86 (12H, s), 2.97-3.00 (4H, m), 3.43-3.48 (4H, m), 3.55 (2H, br), 7.16 (2H, d, J = 7.2Hz), 7.44-7.56 (4H, m), 8.21 (2H, d, J = 7.2Hz), 8.31 (2H, d, J = 8.4Hz), 8.50 (2H, d, J = 8.4 Hz). <sup>13</sup>C NMR (300 MHz, CDCl<sub>3</sub>):  $\delta_C$  25.37, 26.02, 42.94, 45.28, 52.73, 54.12, 54.53, 69.91, 115.00, 118.86, 123.04, 128.03, 129.31, 129.53, 129.67, 129.99, 134.82, 151.74. Mass Spectrum EI<sup>+</sup>: m/z 514 ([C<sub>38</sub>H<sub>54</sub>N<sub>6</sub>S<sub>3</sub>O<sub>5</sub>]<sup>+</sup>).

#### **Synthesis of [Zn(L<sup>1c</sup>)](ClO<sub>4</sub>)<sub>2</sub> (3)**

To a solution of L<sup>1c</sup> (40 mg, 0.15 mmol) in 5 cm<sup>3</sup> of MeCN 56.4 mg (0.15 mmol) of Zn(ClO<sub>4</sub>)<sub>2</sub> · 6 H<sub>2</sub>O. The resulting colourless solution was stirred for four hours at room temperature. The solvent was partially removed under reduced pressure and the product crystallised by diffusion of Et<sub>2</sub>O vapour into the remaining solution. Colourless crystals were obtained (28 mg, 0.062 mmol, 41% yield). Mp.: up to 250 °C. Elem. Anal: found (calc. for C<sub>11</sub>H<sub>24</sub>N<sub>2</sub>S<sub>2</sub>O<sub>9</sub>Cl<sub>2</sub>Zn): C, 25.66 (24.99); H, 4.76 (4.58); N, 5.48 (5.30); S, 12.65 (12.13).

#### **Synthesis of [Cd(L<sup>1c</sup>)](NO<sub>3</sub>)](NO<sub>3</sub>) (4)**

This complex was obtained as colourless crystals using the same procedure described for **3**. Yield: 51%. Mp.: 249-250°C. Elem. Anal: found (calc. for C<sub>11</sub>H<sub>24</sub>N<sub>4</sub>S<sub>2</sub>O<sub>7</sub>Cd): C, 26.73 (26.38); H, 4.55 (4.83); N, 11.21 (11.19); S, 12.45 (12.80).

#### **Synthesis of [Hg(L<sup>2c</sup>)](ClO<sub>4</sub>)<sub>2</sub> (5)**

This complex was obtained as colourless crystals using the same procedure described for **3**. Yield: 56%. Mp.: 266-267°C. Elem. Anal: found (calc. for C<sub>11</sub>H<sub>24</sub>N<sub>2</sub>S<sub>3</sub>O<sub>8</sub>Cl<sub>2</sub>Hg): C, 19.66 (19.43); H, 3.89 (3.56); N, 4.23 (4.12); S, 14.82 (14.15).

### Synthesis of [Cd(L<sup>3a</sup>)(NO<sub>3</sub>)<sub>2</sub>] (1)

This complex was obtained as colourless crystals using the same procedure described for **3**. Yield: 27%. Mp.: up to 250°C. Elem. Anal: found (calc. for C<sub>8</sub>H<sub>18</sub>N<sub>4</sub>SO<sub>7</sub>Cd): C, 22.73 (22.52); H, 4.32 (4.25); N, 13.05 (13.13); S, 7.45 (7.51).

### Synthesis of [Cu(L<sup>4a</sup>)(dmf)](ClO<sub>4</sub>)<sub>2</sub> (2)

This complex was obtained as blue crystals using the same procedure described for **3**. After reaction, the solvent was removed under reduced pressure and the resulting residue was crystallised by diffusion of Et<sub>2</sub>O vapours into a dmf solution. Yield: 24%. M.p.: 182-183°C. Anal: found (calc. for C<sub>13</sub>H<sub>28</sub>N<sub>2</sub>S<sub>2</sub>O<sub>11</sub>Cl<sub>2</sub>Cu): C, 26.38 (26.60); H, 4.85 (4.81); N, 4.80 (4.77); S, 11.15 (10.92).

**Table S1.** Protonation constants (log *K*) of L<sup>3a</sup>, L<sup>1c</sup>, L<sup>2c</sup>, L<sup>3c</sup>, and L<sup>4c</sup> (*I* = 0.1 M, 298.1 K).

| reaction                                                                             | L <sup>3a</sup> | L <sup>1c</sup> | L <sup>2c</sup> | L <sup>3c</sup> | L <sup>4c</sup> |
|--------------------------------------------------------------------------------------|-----------------|-----------------|-----------------|-----------------|-----------------|
| L + H <sup>+</sup> ⇌ (HL) <sup>+</sup>                                               | 9.14(3)         | 9.98(3)         | 9.66(1)         | 10.01(2)        | 10.11(2)        |
| (HL) <sup>+</sup> + H <sup>+</sup> ⇌ (H <sub>2</sub> L) <sup>2+</sup>                | 6.80(3)         | 6.93(5)         | 5.80(1)         | 9.69(3)         | 3.19(3)         |
| (H <sub>2</sub> L) <sup>2+</sup> + H <sup>+</sup> ⇌ (H <sub>3</sub> L) <sup>3+</sup> |                 |                 |                 | 7.18(3)         |                 |
| (H <sub>3</sub> L) <sup>3+</sup> + H <sup>+</sup> ⇌ (H <sub>4</sub> L) <sup>4+</sup> |                 |                 |                 | 5.35(3)         |                 |

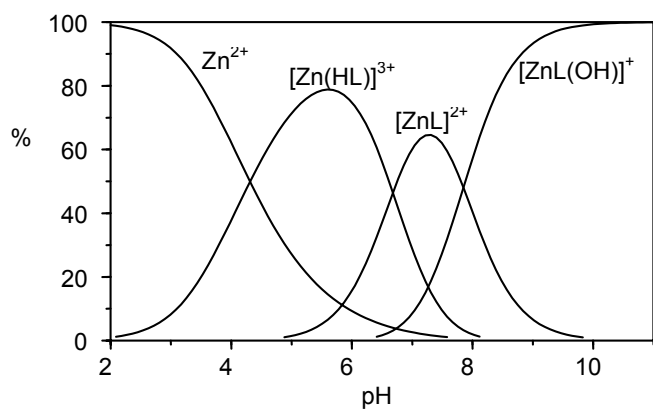

(a)

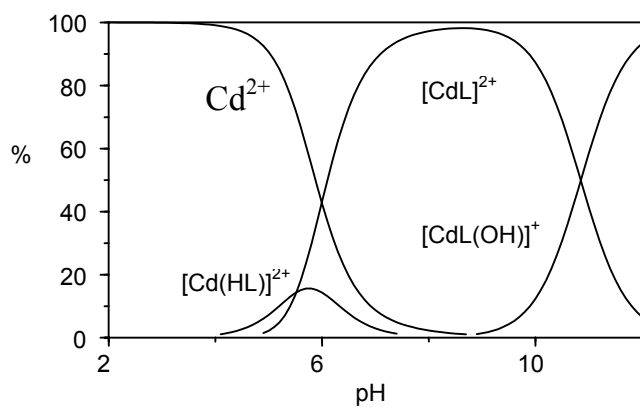

(b)

**Figure S1.** Distribution diagrams for the systems  $Zn^{II}/L^{1c}$  (a), and  $Cd^{II}/L^{1c}$  (b) ( $[M^{II}] = [L^{1c}] = 1 \times 10^{-3}$  M, 298.1 K,  $I = 0.1$  M).

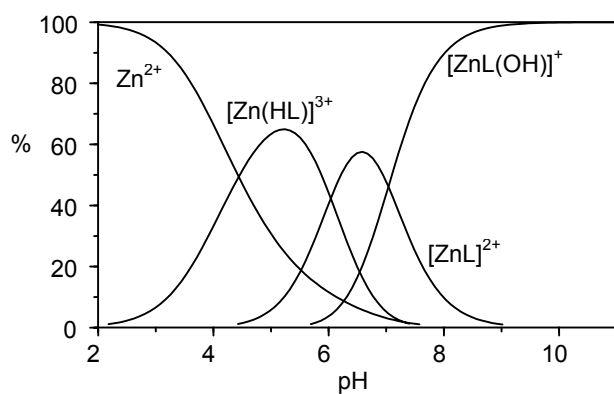

**Figure S2.** Distribution diagram for the system  $Zn^{II}/L^{2c}$  ( $[M^{II}] = [L^{2c}] = 1 \times 10^{-3}$  M, 298.1 K,  $I = 0.1$  M).

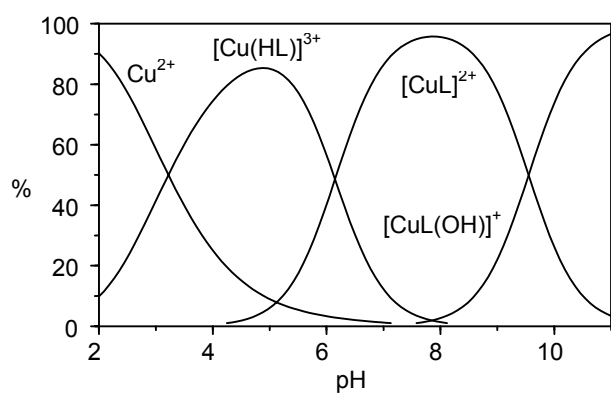

(a)

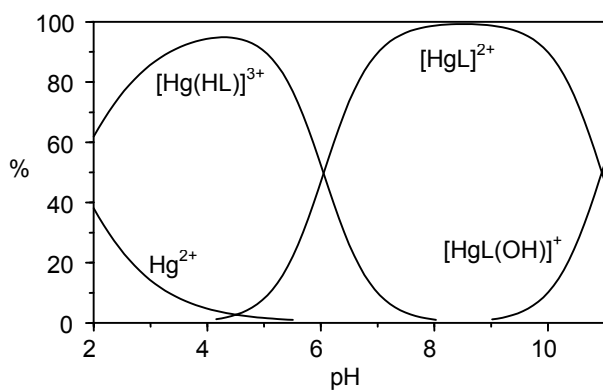

(b)

**Figure S3.** Distribution diagrams for the systems Cu<sup>II</sup>/L<sup>2c</sup> (a), and Hg<sup>II</sup>/L<sup>2c</sup> (b) ( $[M^{II}] = [L^{2c}] = 1 \times 10^{-3}$  M,  $T = 298.1$  K,  $I = 0.1$  M)

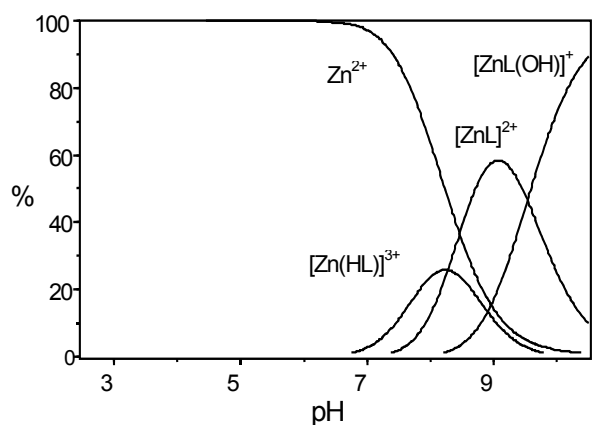

(a)

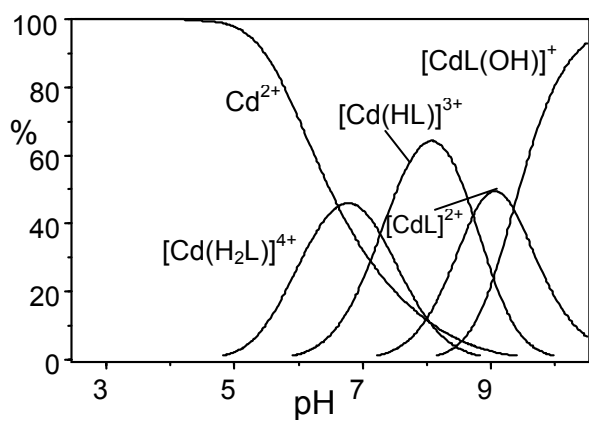

(b)

**Figure S4.** Distribution diagram for the systems Zn<sup>II</sup>/L<sup>3c</sup> (a), and Cd<sup>II</sup>/L<sup>3c</sup> (b) ( $[M^{II}] = [L^{3c}] = 1 \times 10^{-3}$  M, 298.1 K,  $I = 0.1$  M).

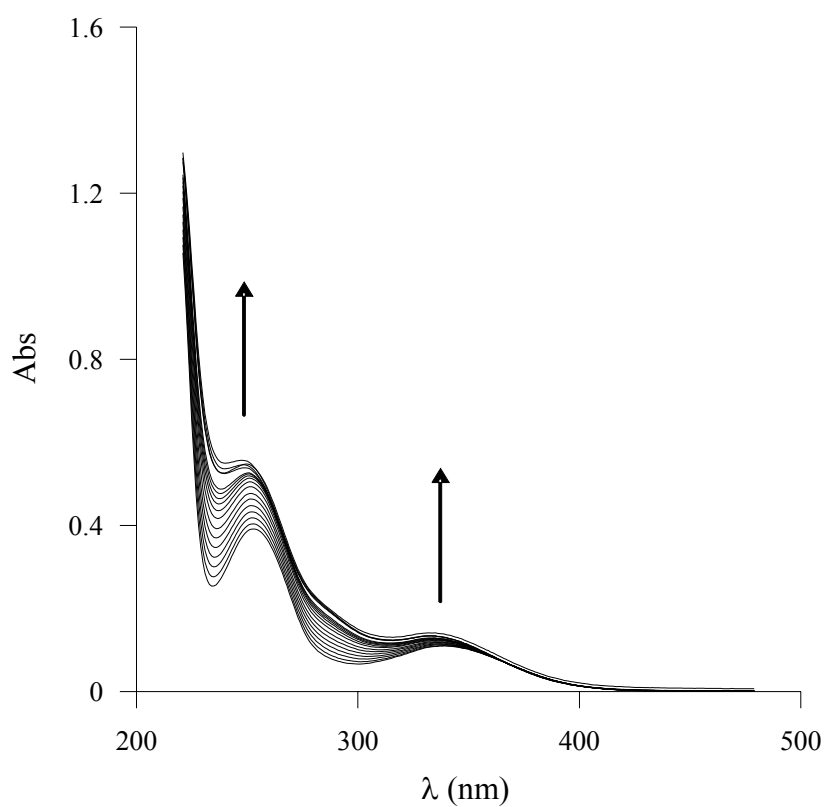

**Figure S5.** Changes in the UV-Vis spectrum of L<sup>4d</sup> [ $2.5 \times 10^{-5}$  M, MeCN/H<sub>2</sub>O (4:1 v/v), pH = 7.0] upon addition of increasing amounts of Hg<sup>II</sup> up to a Hg<sup>II</sup>/L<sup>4d</sup> molar ratio of 2.



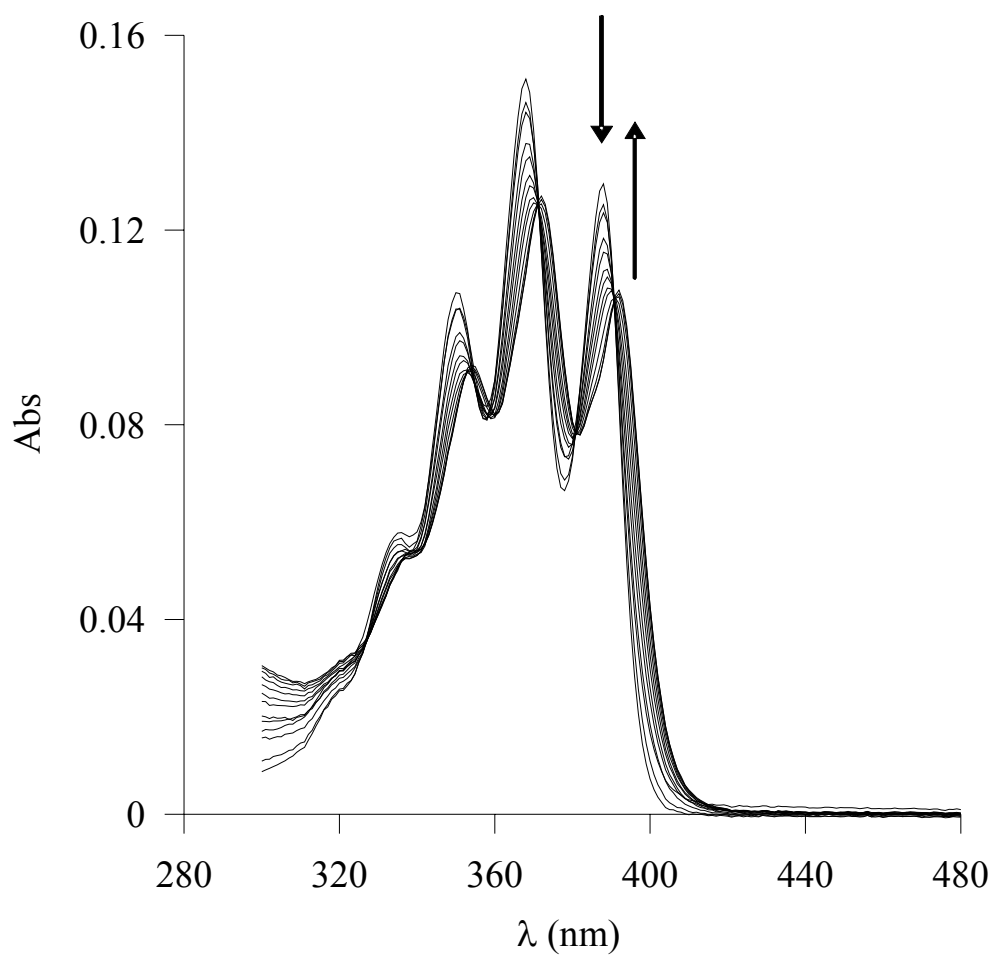

**Figure S6.** Changes in the UV-Vis spectrum of  $L^{2e}$  [ $2.5 \times 10^{-5}$  M, MeCN/ $H_2O$  (4:1 v/v), pH = 7.0] upon addition of increasing amounts of  $Hg^{II}$  up to a  $Hg^{II}/L^{2e}$  molar ratio of 2.
